# Supplementary material for: Copper nanoparticle anchored biguanidine-modified Zr-UiO-66 MOFs: a competent heterogeneous and reusable nanocatalyst in Buchwald–Hartwig and Ullmann type coupling reactions
Source: Royal Society of Chemistry journal article supplement (doi:10.1039/d1ra02634h), 2021-01-01

## Supplementary Section

### Copper nanoparticles anchored biguanidine-modified Zr-UiO-66 MOFs : A competent heterogeneous and reusable nanocatalyst in Buchwad-Hartwig and Ullmann type coupling reactions

Hojat Veisi,<sup>a,\*</sup> Narges Neyestani,<sup>a</sup> Mozhgan Pirhayati,<sup>b</sup> Sheida Ahany Kamangar,<sup>a</sup> Shahram Lotfi,<sup>a</sup>  
Taiebeh Tamoradi,<sup>a,\*</sup> Bikash Karmakar<sup>c,\*</sup>

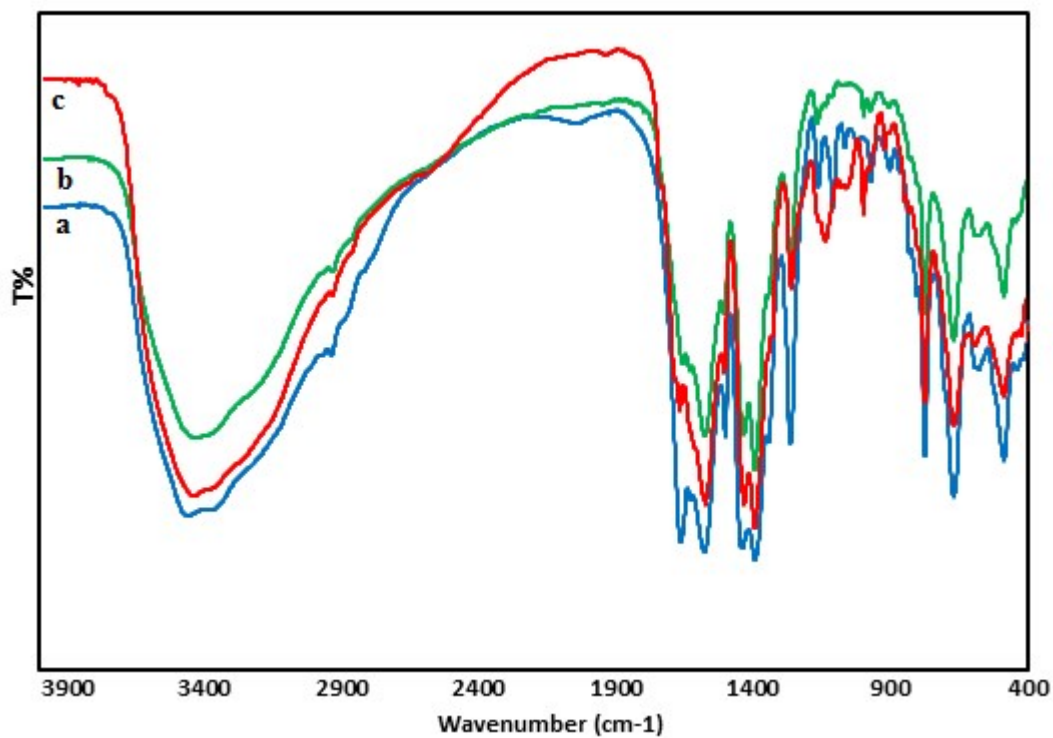

**Fig. S1.** FT-IR spectra of UiO-66-NH<sub>2</sub> (a), UiO-66-biguanidine (b) and UiO-66-biguanidine/Cu(c).

# $^1\text{H-NMR}$ and $^{13}\text{C-NMR}$ for selected products

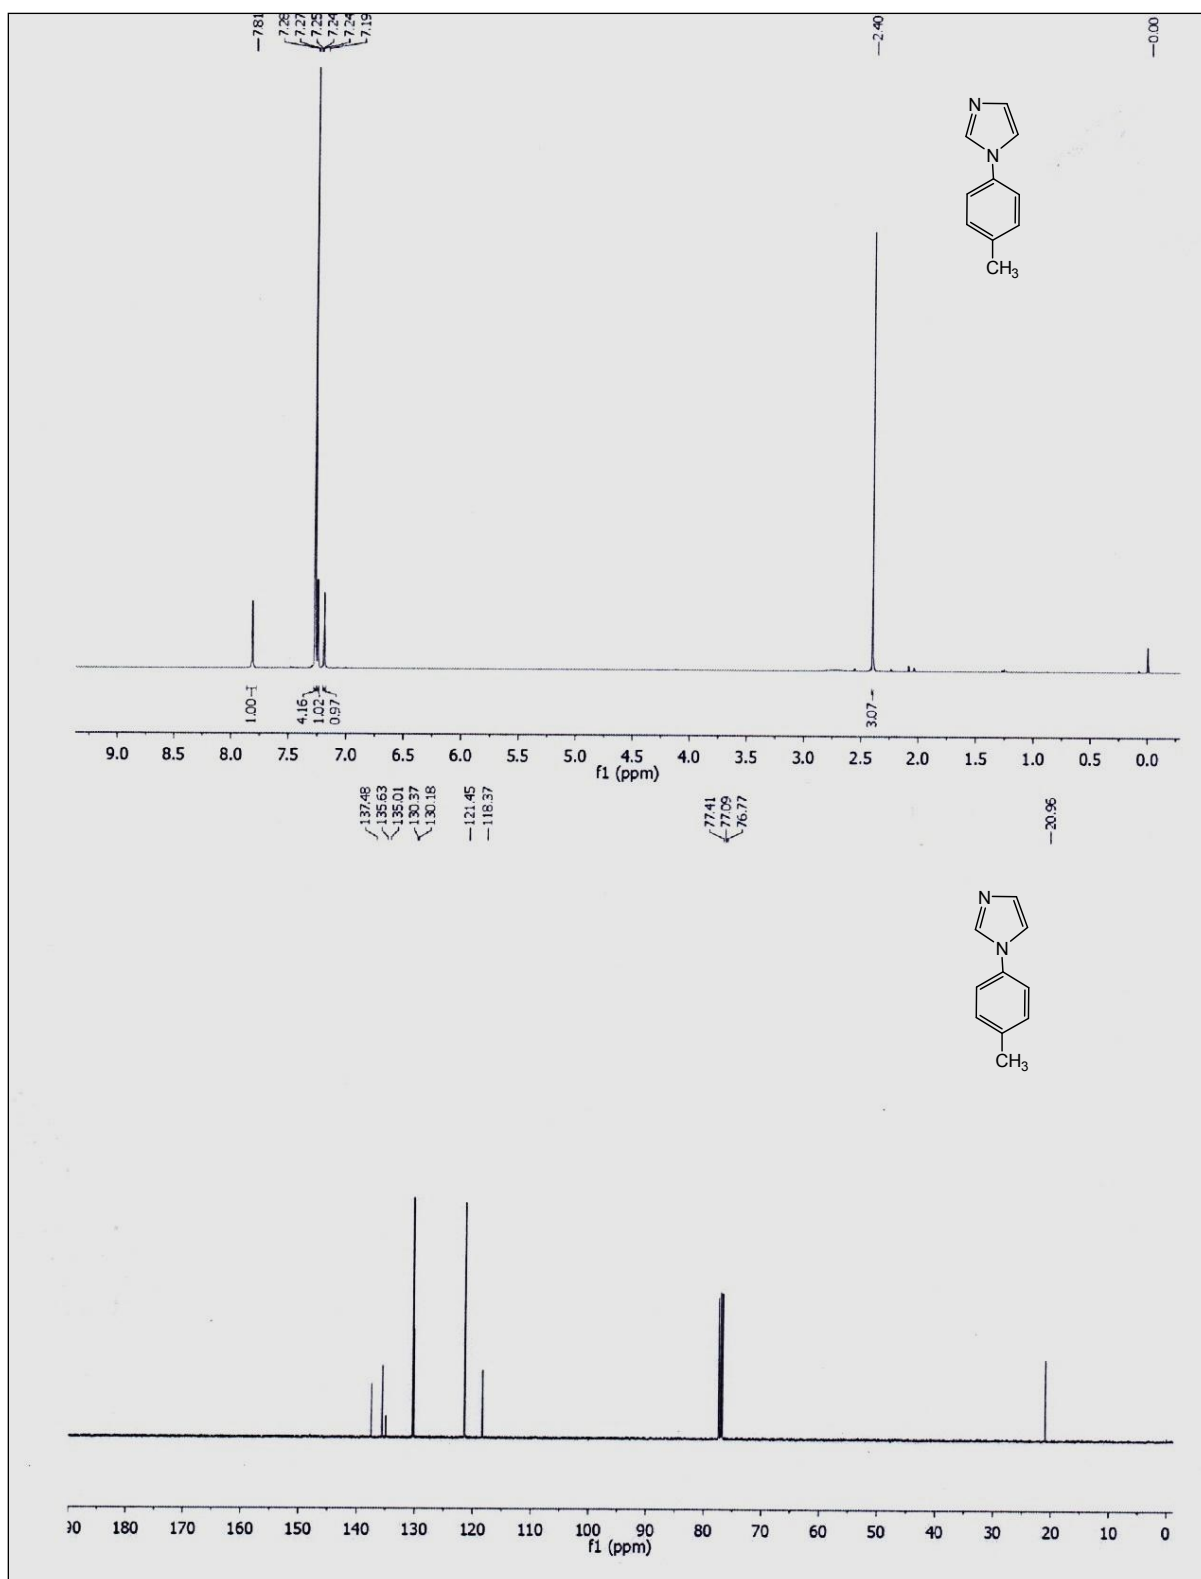

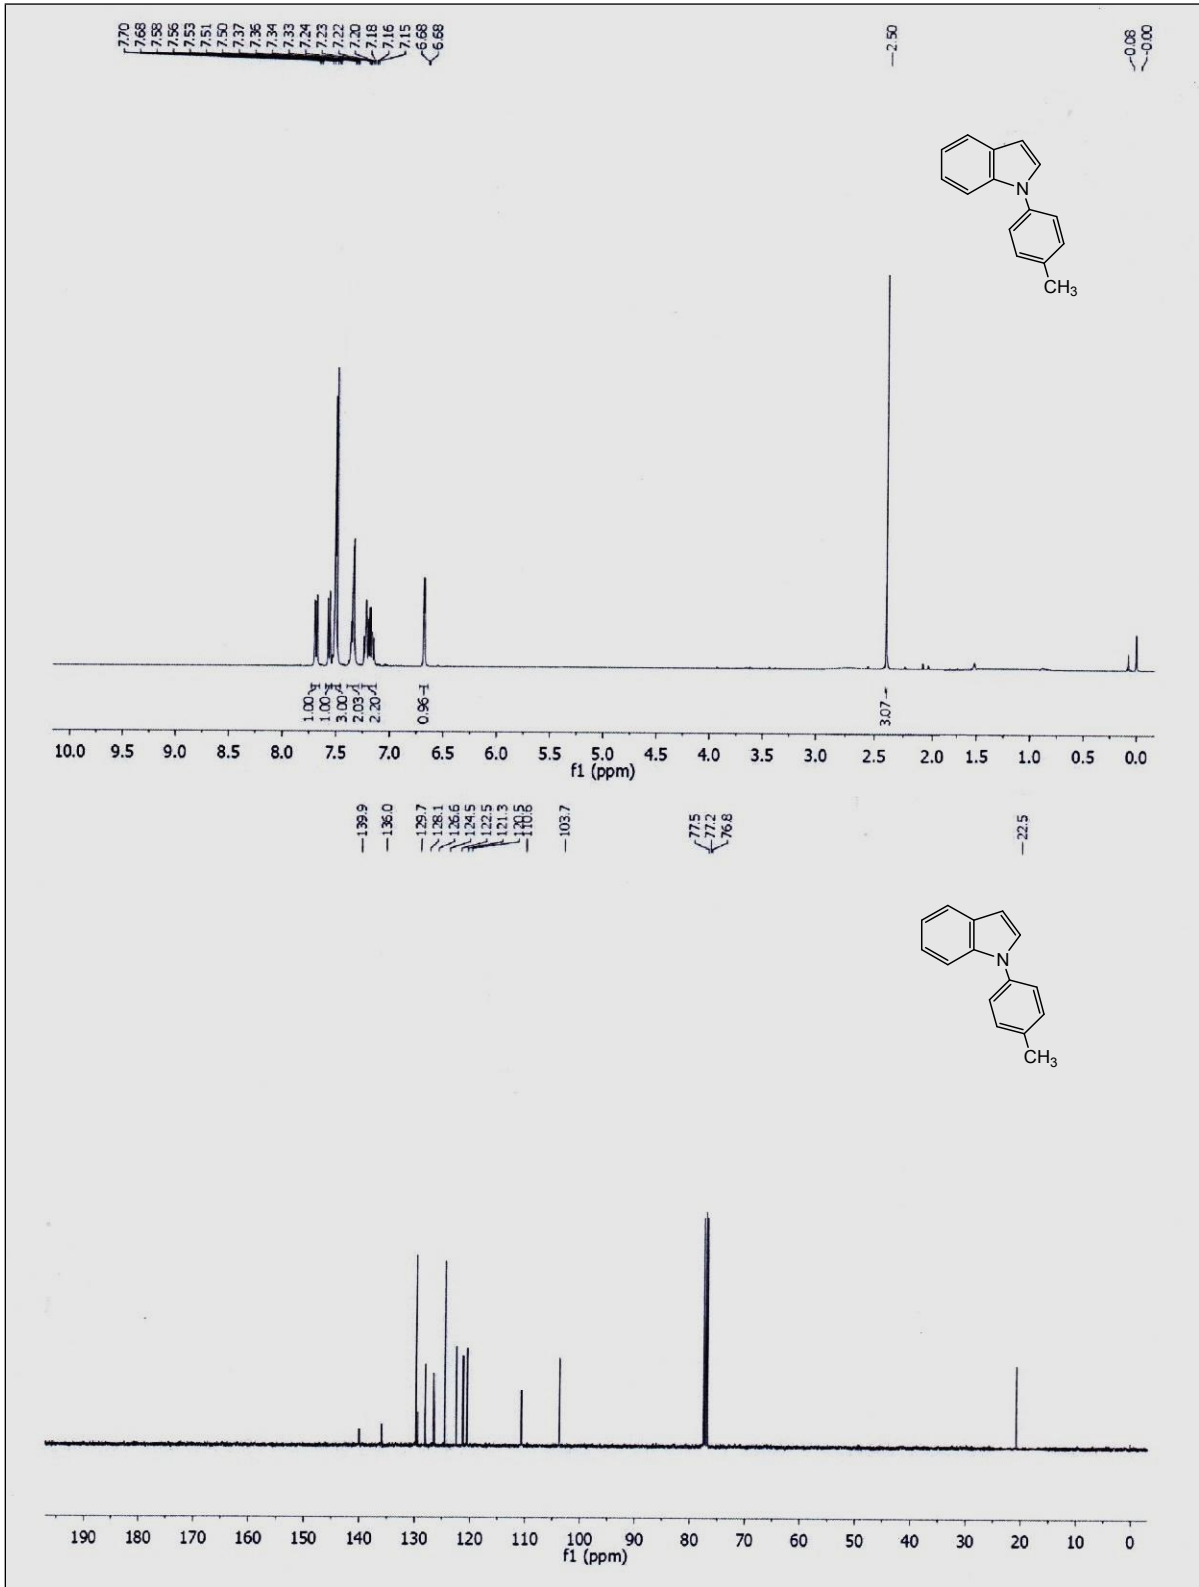



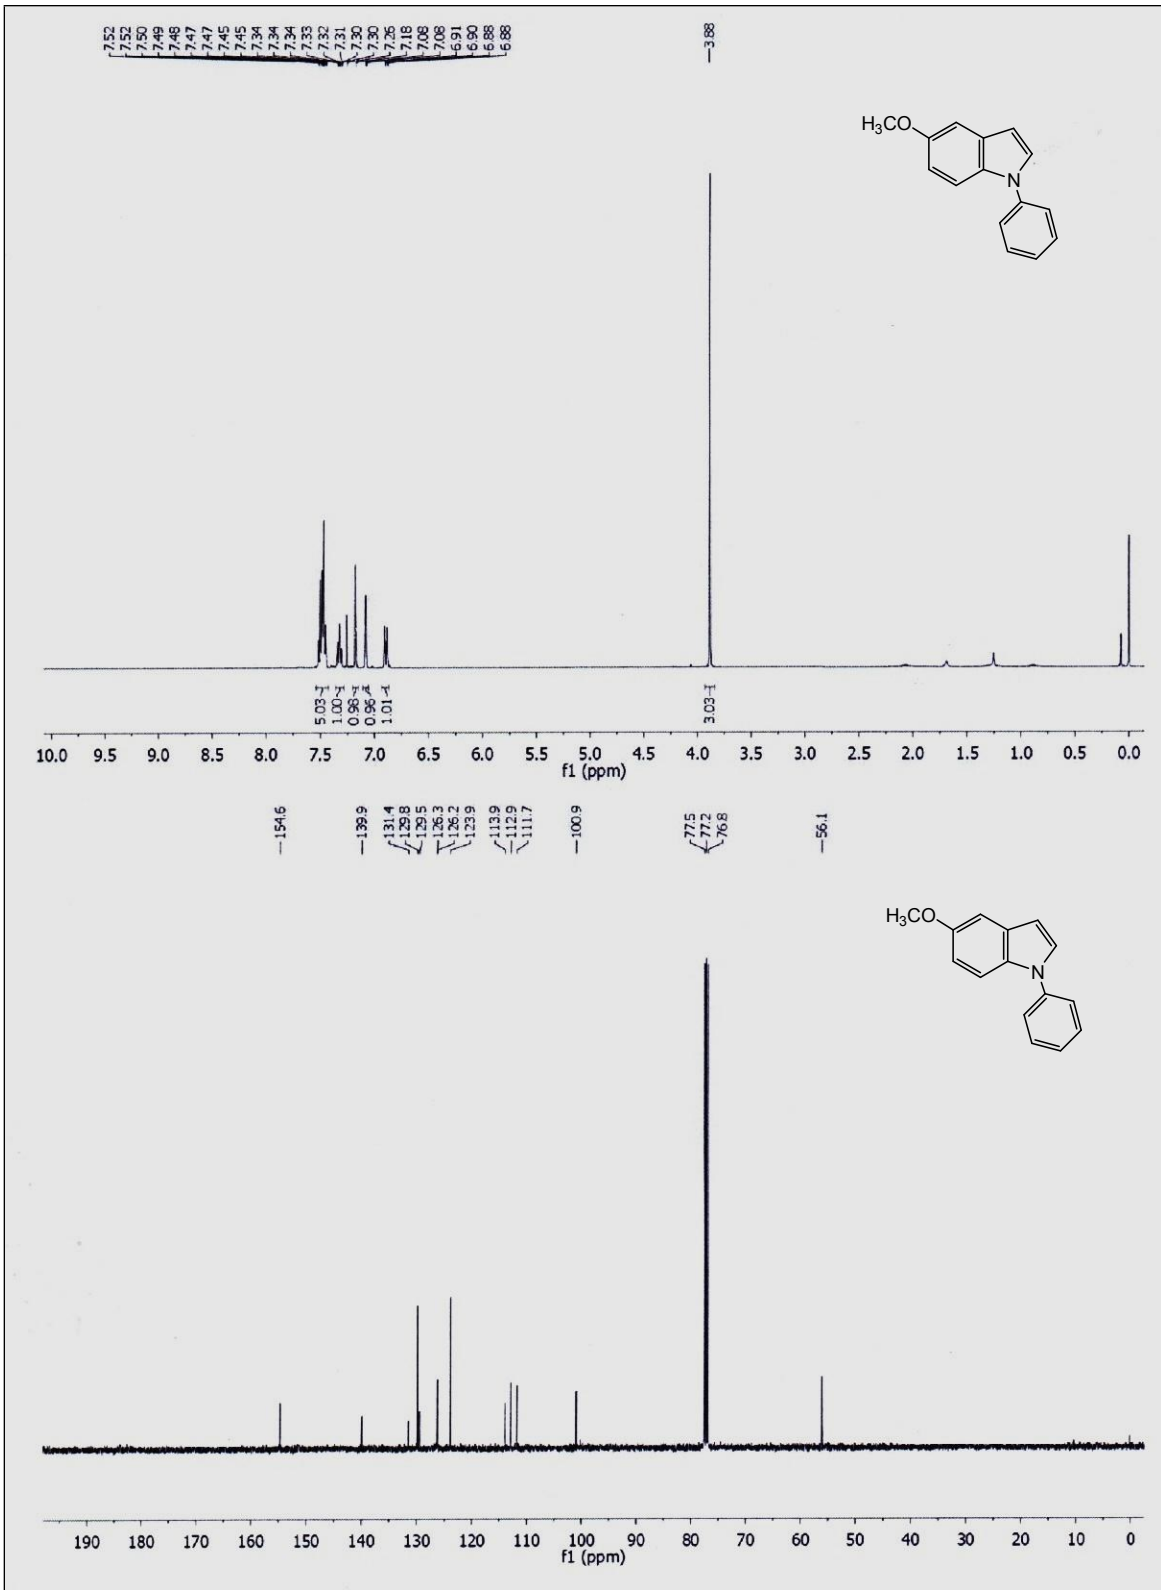

Supplement: d1ra02634h1.pdf [file d1ra02634h1.pdf]
